# Supplementary material
Source: PubMed Central journal article supplement (PMC4512833)
Supplement: NIHMS702758-supplement-Supplemental_file.pdf [file NIHMS702758-supplement-Supplemental_file.pdf]

Appendix 1. REE (kcal/d) for each modality and time. (Mean  $\pm$  SD).

| Modality | Treatment | Base           | IP                           | 30min           | 60min           |
|----------|-----------|----------------|------------------------------|-----------------|-----------------|
| AEE      | CHO       | 1746 $\pm$ 214 | 2026 $\pm$ 240               | 1649 $\pm$ 173  | 1573 $\pm$ 190  |
|          | PRO       | 1704 $\pm$ 247 | 2149 $\pm$ 230               | 1806 $\pm$ 193  | 1763 $\pm$ 175  |
|          | Mean      | 1725 $\pm$ 231 | 2088 $\pm$ 235               | 1728 $\pm$ 183  | 1668 $\pm$ 183  |
| HIIT     | CHO       | 1681 $\pm$ 312 | 2805 $\pm$ 469               | 1840 $\pm$ 279  | 1750 $\pm$ 281  |
|          | PRO       | 1546 $\pm$ 301 | 2828 $\pm$ 599               | 1750 $\pm$ 265  | 1728 $\pm$ 267  |
|          | Mean      | 1614 $\pm$ 307 | 2817 $\pm$ 534* <sup>#</sup> | 1795 $\pm$ 272* | 1739 $\pm$ 274* |
| HIRT     | CHO       | 1638 $\pm$ 281 | 2073 $\pm$ 340               | 1699 $\pm$ 311  | 1623 $\pm$ 294  |
|          | PRO       | 1688 $\pm$ 305 | 2189 $\pm$ 292               | 1879 $\pm$ 198  | 1786 $\pm$ 188  |
|          | Mean      | 1663 $\pm$ 293 | 2131 $\pm$ 316               | 1789 $\pm$ 255  | 1705 $\pm$ 241  |

\* Indicates significant difference between AEE and HIIT (p<0.0001-p=0.0022)

# Indicates significant difference between HIIT and HIRT (p<0.0001)

REE = resting energy expenditure (kcal/day), AEE = aerobic endurance exercise, HIIT = high-intensity interval run, HIRT = high-intensity resistance training, CHO = carbohydrate, PRO = protein, Base = baseline measurement, IP = immediately post-exercise measurement, 30min = 30 minutes post-exercise measurement, 60min = 60 minutes post-exercise measurement

Appendix 2. RER for each modality, treatment, and time. (Mean  $\pm$  SD)

| Modality | Treatment | Base            | IP                            | 30min                         | 60min                        |
|----------|-----------|-----------------|-------------------------------|-------------------------------|------------------------------|
| AEE      | CHO       | 0.82 $\pm$ 0.05 | 0.88 $\pm$ 0.06               | 0.83 $\pm$ 0.05               | 0.83 $\pm$ 0.05              |
|          | PRO       | 0.86 $\pm$ 0.08 | 0.87 $\pm$ 0.06               | 0.80 $\pm$ 0.04               | 0.80 $\pm$ 0.04              |
|          | Collapsed | 0.84 $\pm$ 0.07 | 0.88 $\pm$ 0.06               | 0.82 $\pm$ 0.05               | 0.82 $\pm$ 0.05              |
| HIIT     | CHO       | 0.83 $\pm$ 0.06 | 0.96 $\pm$ 0.07               | 0.74 $\pm$ 0.05               | 0.80 $\pm$ 0.05              |
|          | PRO       | 0.84 $\pm$ 0.04 | 0.97 $\pm$ 0.10               | 0.73 $\pm$ 0.05               | 0.75 $\pm$ 0.03              |
|          | Collapsed | 0.84 $\pm$ 0.05 | 0.97 $\pm$ 0.09* <sup>#</sup> | 0.74 $\pm$ 0.05* <sup>#</sup> | 0.78 $\pm$ 0.04*             |
| HIRT     | CHO       | 0.85 $\pm$ 0.06 | 0.88 $\pm$ 0.05               | 0.78 $\pm$ 0.05               | 0.81 $\pm$ 0.04              |
|          | PRO       | 0.84 $\pm$ 0.05 | 0.86 $\pm$ 0.06               | 0.76 $\pm$ 0.07               | 0.77 $\pm$ 0.05              |
|          | Collapsed | 0.85 $\pm$ 0.06 | 0.87 $\pm$ 0.06               | 0.77 $\pm$ 0.06 <sup>§</sup>  | 0.79 $\pm$ 0.05 <sup>§</sup> |

\* Indicates significant difference between AEE and HIIT (p<0.0001-p=0.0020)

# Indicates significant difference between HIIT and HIRT (p<0.0001-p=0.0169)

§ Indicates significant difference between AEE and HIRT (p=0.0004-0.0265) RER = respiratory exchange ratio, AEE = aerobic endurance exercise, HIIT = high-intensity interval run, HIRT = high-intensity resistance training, CHO = carbohydrate, PRO = protein, Base = baseline measurement, IP = immediately post-exercise measurement, 30min = 30 minutes post-exercise measurement, 60min = 60 minutes post-exercise measurement
